# Supplementary material for: Impact of Temperature and Humidity on Periprosthetic Joint Infections Following Total Knee Arthroplasty: A 12-Year Study in a Mediterranean Climate
Source: Research Square preprint supplement (doi:10.21203/rs.3.rs-6536892/v1), 2025-05-09
Supplement: Supplementary file 1 [file 014a0bcb42a3a3bd01109c5d.docx]

**Table 3.** Culture results of patients with bacterial growth

| Microorganisms | n | % |
| --- | --- | --- |
| *Staphylococcus aureus* | 9 | 24.3 |
| *Staphylococcus epidermidis* | 8 | 21.6 |
| *Coagulase-Negative Staphylococcus* | 5 | 13.5 |
| *Staphylococcus haemolyticus* | 5 | 13.5 |
| *Pseudomonas aeruginosa* | 2 | 5.4 |
| *Group G Streptococcus* | 2 | 5.4 |
| *Enterococcus faecium* | 1 | 2.7 |
| *Group A Streptococcus* | 1 | 2.7 |
| *Group B Streptococcus* | 1 | 2.7 |
| *Proteus spp.* | 1 | 2.7 |
| *Staphylococcus warneri* | 1 | 2.7 |
| *Streptococcus parasanguinis* | 1 | 2.7 |
| Total | 37 | 100 |
