# Supplementary material for: Impact of Temperature and Humidity on Periprosthetic Joint Infections Following Total Knee Arthroplasty: A 12-Year Study in a Mediterranean Climate
Source: Research Square preprint supplement (doi:10.21203/rs.3.rs-6536892/v1), 2025-05-09
Supplement: Supplementary file 2 [file 47585044e2f5e8d96224c199.docx]

**Table 4.**  Comparison of PJI incidence according to temperature and relative humidity categories.

| Temperature Categories | Total, n (%) | No PJI | PJI | PJI incidence, % | p* |
| --- | --- | --- | --- | --- | --- |
| ≤5 °C | 30 (0.5) | 28 | 2 | 6.7 | **0.007** |
| >5-10 °C | 211 (3.8) | 206 | 5 | 2.4 |
| >10-15 °C | 1617 (29.3) | 1589 | 28 | 1.7 |
| >15-20 °C | 1496 (27.1) | 1475 | 21 | 1.4 |
| >20-25 °C | 1004 (18.2) | 1000 | 4 | 0.4 |
| >25-30 °C | 854 (15.5) | 843 | 11 | 1.3 |
| >30-35 °C | 308 (5.6) | 301 | 7 | 2.3 |
| Relative Humidity Categories |  |  |  |  |  |
| Low (RH < 50) | 1801 (32.6) | 1774 | 27 | 1.5 | 0.174 |
| Medium (50 ≤ RH ≤80) | 2943 (53.3) | 2908 | 35 | 1.2 |
| High (RH >80) | 776 (14.1) | 760 | 16 | 2.1 |

**Chi-Square Test. RH: Relative Humidity*
