# Supplementary material for: Impact of Temperature and Humidity on Periprosthetic Joint Infections Following Total Knee Arthroplasty: A 12-Year Study in a Mediterranean Climate
Source: Research Square preprint supplement (doi:10.21203/rs.3.rs-6536892/v1), 2025-05-09
Supplement: Supplementary file 3 [file 6f6816b2c8c1949aeafed011.docx]

**Table 1.** Previous studies that reported seasonal relationship between PJI and TJA in the current literature.

| Author | Year | # Patients | Cases | Study  Period | Country | City | Climate | Overall  Infection rate | Temperature & Humidity | Seasonal variation in infection rate |
| --- | --- | --- | --- | --- | --- | --- | --- | --- | --- | --- |
| Kane et al. | 2014 | 750 | TKA, rTKA, THA, rTHA | 1 yr | USA | Philadelphia | Humid Continental | 2.26% | NR | Higher PJI rates in summer |
| Ng et al. | 2017 | 94,907 | THA | 5 yr | USA | Nationwide | Various | 0.5% | NR | No significant relationship between seasonality and infection rates |
| Rosas et al. | 2017 | 1,311,672 | THA | 10 yr | USA | Nationwide | Various | 0.92% | NR | Higher infection rates in Midwest and South regions during winter |
| Parkinson et al. | 2018 | 219,983 | TKA | 5 yr | Australia | Nationwide | Tropical &  Nontropical | 0.73% Tropical,  0.37% Nontropical | NR | The tropical region of Australia demonstrated a seasonal variation in the rate of PJI with a higher rate during the warmer monsoon wet season of summer and fall |
| Anthony et al. | 2018 | 760,283 | THA & TKA | 1 yr | USA | Nationwide | Various | 0.6% | NR | SSI was higher in June and lower in December |
| Armit et al. | 2018 | 1058 | TKA | 13 yr | Australia | Cairns | Tropical | 2.74% | Yes | Humidity above 60% and temperature over 30°C associated with increased infection risk |
| Sodhi et al. | 2018 | 147,473 | TKA | 5 yr | USA | Nationwide | Various | 0.3% | NR | SSI was lowest in winter |
| Hald et al. | 2021 | 124,809 | TKA & UKA | 18 yr | Denmark | Nationwide | Various | 0.27% | NR | No significant seasonal variation in infection rates |
| Giambelluca et al. | 2022 | 3,696 | TKA & THA | 4 yr | USA | New Orleans | Subtropical | 0.76% | Yes | No significant relationship between seasonality and infection rates |
| Roof et al. | 2022 | 15,703 | THA | 10 yr | USA | New York | Humid Continental | 1.04% | No | No significant relationship between seasonality and infection rates |
| Damonti et al. | 2023 | 116,981 | THA & TKA | 7 yr | Switzerland | Nationwide | Continental Climate | 1.02% | Yes | SSI rates appear to increase with higher temperatures |
| Yang et al. | 2023 | 1549 | THA & TKA | 10 yr | China | Hangzhou | Subtropical | 1.87% | NR | Late summer is associated with higher PJI risk |
| Kreinces et al. | 2023 | 15,230 | TKA | 10 yr | USA | New York | Humid Continental | 1.11% | NR | No significant seasonal variation in dSSI rates |
| Joanroy et al. | 2024 | 58,449 | THA | 10 yr | Denmark | Nationwide | Various | 1% | Yes | No difference in infection rates between summer and other seasons |
| Current Study | 2024 | 5520 | TKA | 12 yr | Turkey | Antalya | Mediterranean | 1.4% | Yes | PJI incidence is high in <5C° and lowest in 20-25C° |

Abbreviations, TKA: Total knee arthroplasty, THA: Total hip arthroplasty, TJA: Total Joint Arthroplasty, rTKA: Revision Total knee arthroplasty, rTHA: Revision Total hip arthroplasty, UKA: Unicondylar knee arthroplasty, USA: United States of America, PJI: Periprosthetic joint infection, NR: Not reported, SSI: Surgical Site Infection, dSSI: deep Surgical Site Infection
