# Supplementary material for: Impact of Temperature and Humidity on Periprosthetic Joint Infections Following Total Knee Arthroplasty: A 12-Year Study in a Mediterranean Climate
Source: Research Square preprint supplement (doi:10.21203/rs.3.rs-6536892/v1), 2025-05-09
Supplement: Supplementary file 4 [file a2c899aee97bc2dbfe36ec5b.docx]

**Table 5.** Multivariate logistic regression analysis of temperature and humidity categories as predictors of periprosthetic joint infection (PJI) risk following total knee arthroplasty.

| Model | OR | 95% CI | p |
| --- | --- | --- | --- |
| Temperature Categories  Reference= >20-25 °C  ≤5 °C  >5-10 °C  >10-15 °C  >15-20 °C  >25-30 °C  >30-35 °C | 18.4  5.9  4.0  3.4  3.3  5.6 | 3.1-109.2  1.6-22.8  1.4-11.6  1.2-9.9  1.1-10.3  1.7-21.4 | **0.001**  **0.009**  **0.010**  **0.026**  **0.044**  **0.006** |
| Relative Humidity  Reference= Low (N<50)  Medium (50≤ N ≤80)  High (N >80) | 1.0  1.5 | 0.6-1.8  0.8-2.9 | 0.983  0.241 |
| *OR: Odds Ratio, CI: Confidence interval*  *Odds ratios (OR) and 95% confidence intervals (CI) are presented for each temperature range and humidity level, with >20-25°C and low humidity used as reference categories.* | | | |
