# Supplementary material for: Impact of Temperature and Humidity on Periprosthetic Joint Infections Following Total Knee Arthroplasty: A 12-Year Study in a Mediterranean Climate
Source: Research Square preprint supplement (doi:10.21203/rs.3.rs-6536892/v1), 2025-05-09
Supplement: Supplementary file 5 [file aeeb2f672d8d8885c97f3eda.docx]

**Table 2.** Demographic characteristics of all patients

| Variables | Total (n:5520) | No PJI (n:5442) | PJI (n:78) | p-value |
| --- | --- | --- | --- | --- |
| Sex (n, %) |  |  |  | **<0.001*** |
| Male | 952 (17.2) | 923 (17.0) | 29 (37.2) |
| Female | 4568 (82.8) | 4519 (83.0) | 49 (62.8) |
| Age  Median (Range) | 67.2±7.7 | 67.1±7.7 | 68.2±8.6 | 0.224** |
| 67.0 (23.0-94.0) | 67.0 (23.0-94.0) | 68.5 (50.0-86.0) |
| Side |  |  |  | 0.075* |
| Unilateral | 4322 (78.3) | 4254 (78.2) | 68 (87.2) |
| Bilateral | 1198 (21.7) | 1188 (21.8) | 10 (12.8) |

**: Chi-Square test, **: Independent Samples t-test*
